# Supplementary material
Source: Springer Nature journal article supplement (https://www.springermedizin.de/resource/supplementary/12985_2008_533_MOESM7_ESM.pdf/9608306)

M 1 2 3

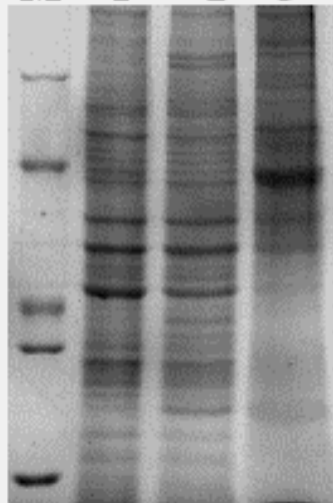

4 5 6

35kD  
→

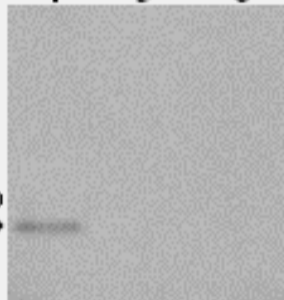

Supplement: MOESM7 [file 9608306]
